# Supplementary material
Source: publisher site journal article supplement (https://www.dovepress.com/article/supplementary_file/586308/586308%20Supplemental%20Tables.docx)
Supplement: Supplementary file 1 [file 586308%20Supplemental%20Tables.docx]

**Supplemental Table 1.** Patterns of inhaler use before and after the index hospitalization for patients receiving or not receiving triple therapy.

| **Variables** | **Triple therapy** | **Non-Triple therapy** |
| --- | --- | --- |
| **(N=329)** | **(N=171)** |
| **Before index hospitalization** |  |  |
| **None** | 53 (16.1) | 49 (28.7) |
| LAMA | 9 (2.7) | 18 (10.5) |
| LAMA+LABA | 40 (12.2) | 50 (29.2) |
| ICS+LABA | 31 (9.4) | 40 (23.4) |
| LABA+LABA+ICS | 196 (59.6) | 13 (7.6) |
| MITT | 174 (52.9) | 13 (7.6) |
| SITT | 22 (6.7) | 0 |
| **After index hospitalization** |  |  |
| LAMA | 0 | 18 (10.5) |
| LAMA+LABA | 0 | 104 (60.8) |
| ICS+LABA | 0 | 49 (28.7) |
| LABA+LABA+ICS | 329 (100) | 0 |
| MITT | 248 (75.4) | 0 |
| SITT | 81 (24.6) | 0 |

LABA, long-acting beta-agonist; LAMA, long-acting muscarinic antagonist; ICS, inhaled corticosteroids; SITT, single-inhaler triple therapy; MITT, multiple-inhaler triple therapy.

**Supplemental Table 2.** Spearman Correlation Coefficients

|  | Age | BMI | CRP | WBC | Neutrophil | Lymphocyte | Monocyte | Eosinophil | Basophil | Neutrophil  count | Lymphocyte  count | Eosinophil  count | NLR | Platelet | Hb | FEV1% | FVC % | FEV1(L) | FVC(L) | FEV1/  FVC % |
| --- | --- | --- | --- | --- | --- | --- | --- | --- | --- | --- | --- | --- | --- | --- | --- | --- | --- | --- | --- | --- |
| Age, years | 1.000 | -0.040 | 0.080 | -0.078 | 0.089 | -0.108 | 0.006 | -0.080 | -0.029 | -0.034 | -0.170 | -0.117 | 0.106 | -0.191 | -0.421 | 0.176 | 0.087 | -0.150 | -0.249 | 0.093 |
| BMI, kg/m2 |  | 1.000 | 0.038 | -0.042 | -0.052 | 0.090 | 0.016 | 0.056 | 0.037 | -0.042 | 0.081 | 0.062 | -0.082 | -0.092 | 0.089 | 0.127 | -0.013 | 0.120 | 0.000 | 0.230 |
| CRP, mg/dL |  |  | 1.000 | 0.312 | 0.247 | -0.325 | 0.204 | -0.333 | -0.210 | 0.353 | -0.138 | -0.273 | 0.318 | 0.114 | -0.189 | 0.041 | 0.030 | 0.013 | -0.006 | 0.059 |
| WBC,109/L |  |  |  | 1.000 | 0.405 | -0.438 | -0.219 | -0.274 | -0.281 | **0.948** | 0.178 | -0.094 | 0.439 | 0.380 | 0.040 | -0.098 | -0.070 | -0.039 | -0.019 | -0.087 |
| Neutrophil, % |  |  |  |  | 1.000 | **-0.916** | -0.488 | -0.586 | -0.477 | 0.643 | -0.695 | -0.509 | **0.937** | -0.019 | -0.107 | -0.031 | 0.008 | -0.042 | -0.035 | -0.049 |
| Lymphocyte, % |  |  |  |  |  | 1.000 | 0.335 | 0.546 | 0.461 | -0.650 | **0.769** | 0.472 | **-0.997** | -0.017 | 0.158 | 0.041 | -0.001 | 0.057 | 0.045 | 0.061 |
| Monocyte, % |  |  |  |  |  |  | 1.000 | 0.106 | 0.183 | -0.298 | 0.221 | 0.054 | -0.362 | 0.026 | -0.012 | 0.011 | 0.020 | -0.035 | -0.037 | 0.053 |
| Eosinophil, % |  |  |  |  |  |  |  | 1.000 | 0.520 | -0.418 | 0.389 | **0.971** | -0.564 | 0.068 | 0.025 | 0.110 | 0.052 | 0.129 | 0.114 | 0.054 |
| Basophil, % |  |  |  |  |  |  |  |  | 1.000 | -0.381 | 0.293 | 0.491 | -0.470 | 0.058 | 0.069 | 0.070 | -0.038 | 0.044 | 0.028 | 0.101 |
| Neutrophil count, 109/L |  |  |  |  |  |  |  |  |  | 1.000 | -0.070 | -0.246 | 0.657 | 0.304 | -0.015 | -0.088 | -0.055 | -0.042 | -0.028 | -0.080 |
| Lymphocyte count, 109/L |  |  |  |  |  |  |  |  |  |  | 1.000 | 0.433 | **-0.766** | 0.241 | 0.191 | -0.019 | -0.046 | 0.036 | 0.031 | 0.020 |
| Eosinophil count, 109/L |  |  |  |  |  |  |  |  |  |  |  | 1.000 | -0.489 | 0.141 | 0.041 | 0.099 | 0.041 | 0.138 | 0.122 | 0.047 |
| NLR |  |  |  |  |  |  |  |  |  |  |  |  | 1.000 | 0.010 | -0.149 | -0.039 | 0.003 | -0.053 | -0.041 | -0.059 |
| Platelet, 103/mL |  |  |  |  |  |  |  |  |  |  |  |  |  | 1.000 | -0.065 | -0.120 | -0.051 | -0.076 | -0.024 | -0.064 |
| Hb, g/dL |  |  |  |  |  |  |  |  |  |  |  |  |  |  | 1.000 | -0.121 | -0.025 | 0.042 | 0.123 | -0.111 |
| FEV1% predicted |  |  |  |  |  |  |  |  |  |  |  |  |  |  |  | 1.000 | **0.729** | **0.759** | 0.516 | 0.538 |
| FVC % predicted |  |  |  |  |  |  |  |  |  |  |  |  |  |  |  |  | 1.000 | 0.627 | 0.678 | 0.082 |
| FEV1(L) |  |  |  |  |  |  |  |  |  |  |  |  |  |  |  |  |  | 1.000 | **0.834** | 0.458 |
| FVC(L) |  |  |  |  |  |  |  |  |  |  |  |  |  |  |  |  |  |  | 1.000 | 0.018 |
| FEV1/FVC % |  |  |  |  |  |  |  |  |  |  |  |  |  |  |  |  |  |  |  | 1.000 |

Spearman Correlation Coefficients >=0.7 or <=-0.7 are shown in bold
